# Supplementary material
Source: PubMed Central journal article supplement (PMC4677409)
Supplement: supp_nov097_nov097supp_tables.pdf [file supp_nov097_nov097supp_tables.pdf]

Supplemental Table 1. Canonical loadings of individual metabolites

| <b>Metabolite</b>   | <b>Canonical Loading</b> |
|---------------------|--------------------------|
| <b>Aspartate</b>    | -0.0813                  |
| <b>Creatine</b>     | -0.629                   |
| <b>Myo-inositol</b> | -0.573                   |
| <b>Lipid 13a</b>    | 0.401                    |
| <b>Taurine</b>      | -0.107                   |

Canonical loadings, a measure of the importance of each metabolite in the classifier, reveals creatine, myo-inositol, and lipid 13a as the most influential metabolites in this classifier.

Supplemental Table 2. Comparing LOOCV classification to true molecular classification

|                                          |                       | <b>LOOCV<br/>Classification</b> |     |
|------------------------------------------|-----------------------|---------------------------------|-----|
|                                          |                       | Group 3 or<br>Group 4           | SHH |
| <b>True Molecular<br/>Classification</b> | Group 3 or<br>Group 4 | 16                              | 1   |
|                                          | SHH                   | 2                               | 10  |

Confusion matrix for the LDA classifier, based on LOOCV. The overall correct classification rate was  $26/29 = 89.7\% \pm 5.6\%$ , with sensitivity for identifying SHH tumors  $10/11 = 90.9\% \pm 8.7\%$  and specificity  $16/18 = 88.9\% \pm 7.4\%$ .
